# Supplementary material
Source: ML conference proceedings conference paper supplement (https://proceedings.neurips.cc/paper_files/paper/2020/hash/d072677d210ac4c03ba046120f0802ec-Abstract.html)
Supplement: Supplementary file [file d072677d210ac4c03ba046120f0802ec-Supplemental.pdf]

---

# Cream of the Crop: Distilling Prioritized Paths For One-Shot Neural Architecture Search

## —— Supplementary Material ——

---

### Appendix A

| Input Shape       | Operators                             | Channels | Repeat | Stride |
|-------------------|---------------------------------------|----------|--------|--------|
| $224^2 \times 3$  | $3 \times 3$ Conv                     | 16       | 1      | 2      |
| $112^2 \times 16$ | $3 \times 3$ Depthwise Separable Conv | 16       | 1      | 2      |
| $56^2 \times 16$  | MBCConv / SkipConnect                 | 24       | 4-6    | 2      |
| $28^2 \times 24$  | MBCConv / SkipConnect                 | 40       | 4-6    | 2      |
| $14^2 \times 40$  | MBCConv / SkipConnect                 | 80       | 4-6    | 1      |
| $14^2 \times 80$  | MBCConv / SkipConnect                 | 96       | 4-6    | 2      |
| $7^2 \times 96$   | MBCConv / SkipConnect                 | 192      | 4-6    | 1      |
| $7^2 \times 192$  | $1 \times 1$ Conv                     | 320      | 1      | 1      |
| $7^2 \times 320$  | Global Avg. Pooling                   | 320      | 1      | 1      |
| 320               | $1 \times 1$ Conv                     | 1,280    | 1      | 1      |
| 1,280             | Fully Connect                         | 1,000    | 1      | -      |

Table 1: The structure of the hypernetwork. The "MBCConv" contains 6 inverted bottleneck residual block MBCConv [1] (kernel sizes of {3,5,7}) with the squeeze and excitation module (expansion rates {4,6}). The "Repeat" represents the maximum number of repeated blocks in a group. The "Stride" indicates the convolutional stride of the first block in each repeated group. When searching for tiny models, the Input Shape will be decreased to reduce Flops.

## Appendix B

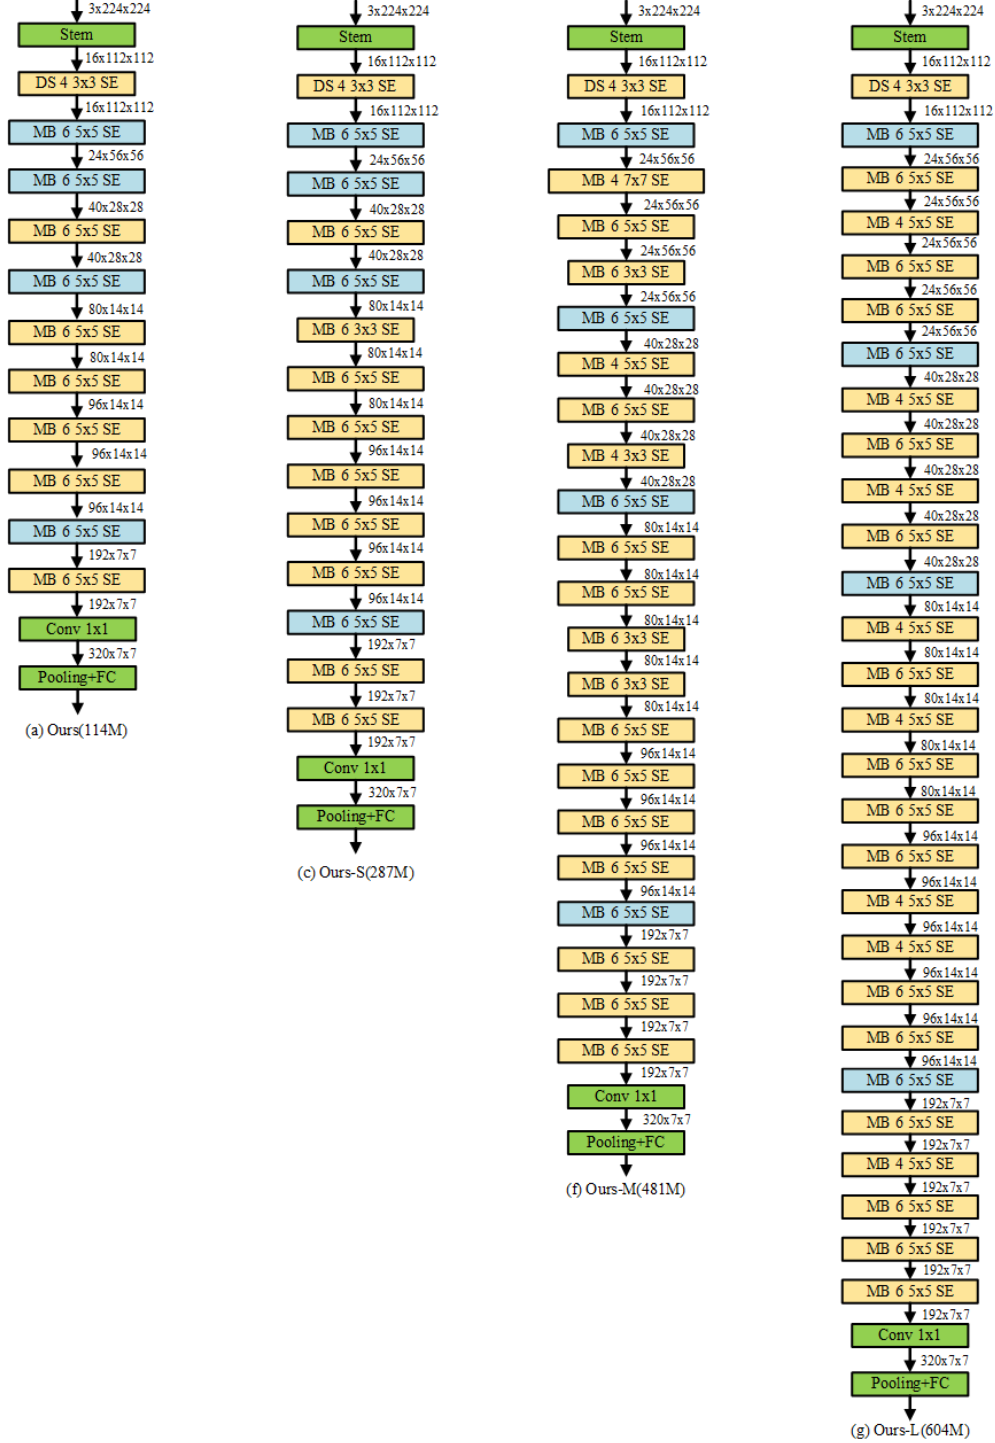

Figure 1: Discovered architectures (100-600M Flops). "MB  $a \times b \times b$ " represents the inverted bottleneck MBConv [1] with the expand rate of  $a$  and kernel size of  $b$ . "DS  $a \times b \times b$ " denotes the depthwise separable convolution with the expand rate of  $a$  and kernel size of  $b$ .

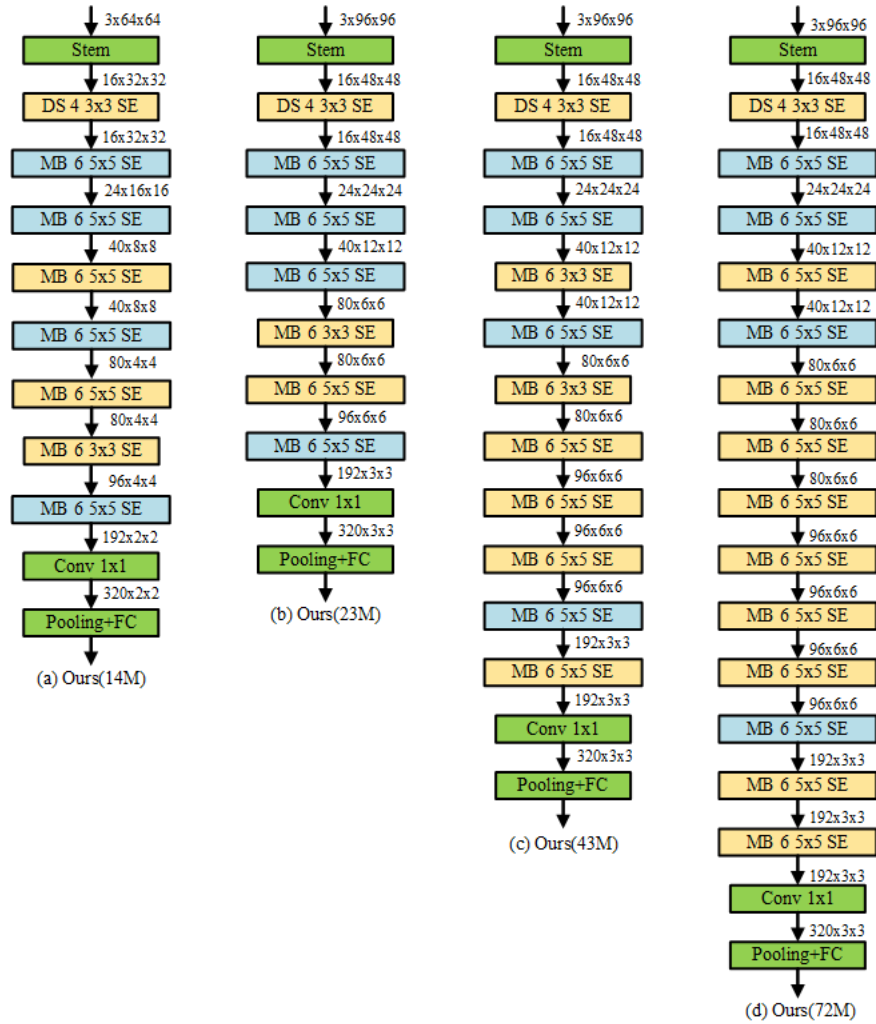

Figure 2: Discovered architectures(0-100M Flops). "MB  $a \times b \times b$ " represents the inverted bottleneck MBConv [1] with the expand rate of  $a$  and kernel size of  $b$ . "DS  $a \times b \times b$ " denotes the depthwise separable convolution with the expand rate of  $a$  and kernel size of  $b$ .

## Appendix C

| Input Shape       | Operators                             | Channels | Repeat | Stride |
|-------------------|---------------------------------------|----------|--------|--------|
| $224^2 \times 3$  | $3 \times 3$ Conv                     | 16       | 1      | 2      |
| $112^2 \times 16$ | $3 \times 3$ Depthwise Separable Conv | 16       | 1      | 2      |
| $56^2 \times 16$  | MBCConv / SkipConnect / ResBlock      | 24       | 4      | 2      |
| $28^2 \times 24$  | MBCConv / SkipConnect / ResBlock      | 40       | 4      | 2      |
| $14^2 \times 40$  | MBCConv / SkipConnect / ResBlock      | 80       | 4      | 1      |
| $14^2 \times 80$  | MBCConv / SkipConnect / ResBlock      | 96       | 4      | 2      |
| $7^2 \times 96$   | MBCConv / SkipConnect / ResBlock      | 192      | 4      | 1      |
| $7^2 \times 192$  | $1 \times 1$ Conv                     | 320      | 1      | 1      |
| $7^2 \times 320$  | Global Avg. Pooling                   | 320      | 1      | 1      |
| 320               | $1 \times 1$ Conv                     | 1,280    | 1      | 1      |
| 1,280             | Fully Connect                         | 1,000    | 1      | -      |

Table 2: The structure of the hypernetwork with additional "ResBlock" operator. The "ResBlock" [2] indicates a residual bottleneck block with kernel size of 3.

| Input Shape       | Operators                               | Channels | Repeat | Stride |
|-------------------|-----------------------------------------|----------|--------|--------|
| $224^2 \times 3$  | $3 \times 3$ Conv                       | 16       | 1      | 2      |
| $112^2 \times 16$ | $3 \times 3$ Depthwise Separable Conv   | 16       | 1      | 2      |
| $56^2 \times 16$  | MBCConv / SkipConnect / ResBlock / Conv | 24       | 4      | 2      |
| $28^2 \times 24$  | MBCConv / SkipConnect / ResBlock / Conv | 40       | 4      | 2      |
| $14^2 \times 40$  | MBCConv / SkipConnect / ResBlock / Conv | 80       | 4      | 1      |
| $14^2 \times 80$  | MBCConv / SkipConnect / ResBlock / Conv | 96       | 4      | 2      |
| $7^2 \times 96$   | MBCConv / SkipConnect / ResBlock / Conv | 192      | 4      | 1      |
| $7^2 \times 192$  | $1 \times 1$ Conv                       | 320      | 1      | 1      |
| $7^2 \times 320$  | Global Avg. Pooling                     | 320      | 1      | 1      |
| 320               | $1 \times 1$ Conv                       | 1,280    | 1      | 1      |
| 1,280             | Fully Connect                           | 1,000    | 1      | -      |

Table 3: The structure of the hypernetwork with additional "ResBlock" and "Normal 2D Conv". The "ResBlock" [2] indicates a residual bottleneck block with kernel size of 3. The "Conv" indicates the standard 2D convolutions with kernel sizes of {1,3,5}.

## References

- [1] Mark Sandler, Andrew Howard, Menglong Zhu, Andrey Zhmoginov, and Liang-Chieh Chen. Mobilenetv2: Inverted residuals and linear bottlenecks. In *CVPR*, 2018. 1, 2, 3
- [2] Kaiming He, Xiangyu Zhang, Shaoqing Ren, and Jian Sun. Deep residual learning for image recognition. In *CVPR*, 2016. 4
